# Supplementary material for: Enhanced quantum efficiency from a mosaic of two dimensional MoS2formed onto aminosilane functionalised substrates
Source: Royal Society of Chemistry journal article supplement (doi:10.1039/c6nr02197b), 2016-01-01
Supplement: c6nr02197b1.pdf [file c6nr02197b1.pdf]

## Enhanced quantum efficiency from a mosaic of two dimensional MoS<sub>2</sub> formed onto aminosilane functionalised substrates

Yichao Wang,<sup>a</sup> Enrico Della Gaspera,<sup>b,c</sup> Benjamin J. Carey,<sup>a</sup> Paul Atkin,<sup>a,c</sup> Kyle J. Berean,<sup>a</sup> Rhiannon M. Clark,<sup>a,c</sup> Ivan S. Cole,<sup>c</sup> Zai-Quan Xu,<sup>d</sup> Yupeng Zhang,<sup>d</sup> Qiaoliang Bao,<sup>d</sup> Jian Zhen Ou,<sup>a</sup> Torben Daeneke,<sup>a</sup> and Kourosh Kalantar-zadeh<sup>a</sup>

a. School of Electrical and Computer Engineering, RMIT University, Melbourne, Victoria, Australia.

b. School of Science, RMIT University, Melbourne, Victoria, Australia

c. CSIRO Manufacturing Flagship, Clayton, Victoria, Australia

d. Department of Materials Science and Engineering, Faculty of Engineering, Monash University, Clayton 3800, Victoria, Australia

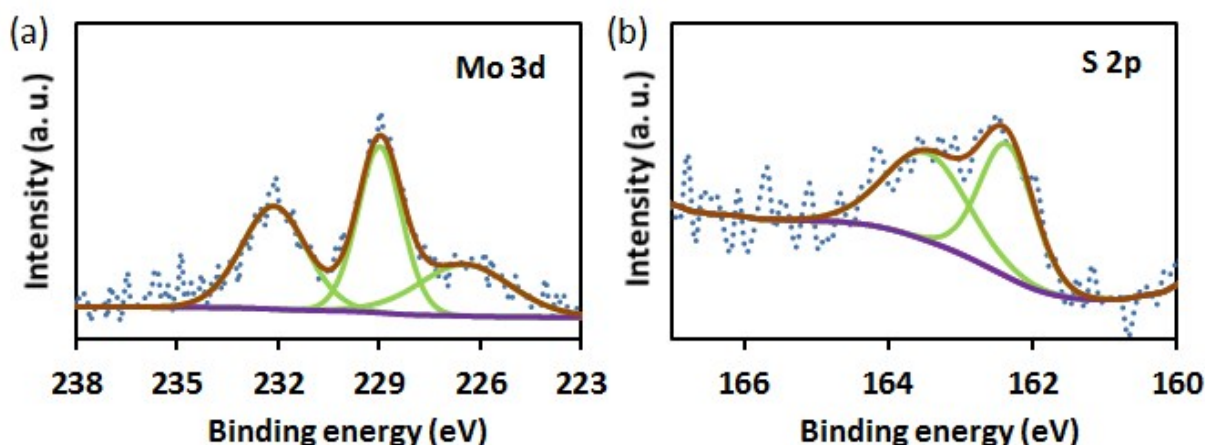

**Figure S1.** XPS spectra of (a) Mo 3d and (b) S 2p binding energies from MoS<sub>2</sub> grown on (3-Aminopropyl)triethoxysilane (APTES) silanised substrate.

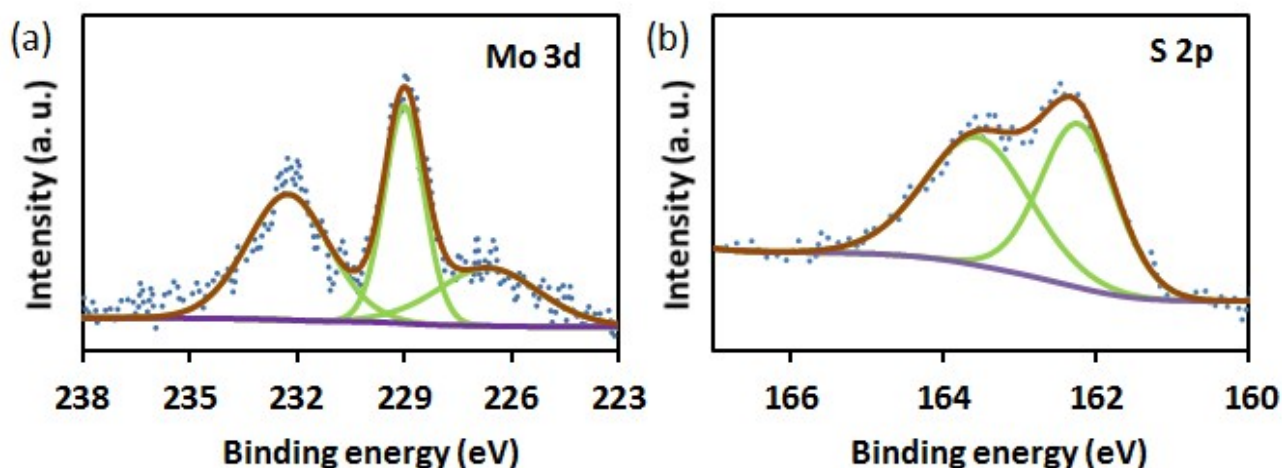

**Figure S2.** XPS spectra of (a) Mo 3d and (b) S 2p binding energies from MoS<sub>2</sub> grown on *N*-[3-(Trimethoxysilyl)propyl]ethylenediamine (AEAPTMS) silanised substrate.

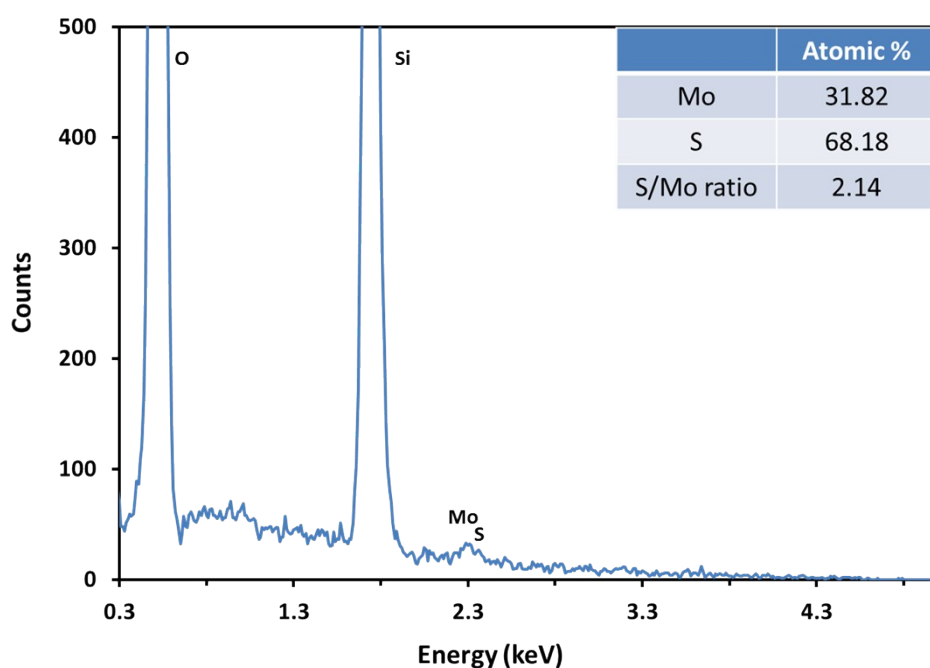

**Figure S3.** EDS spectrum of the MoS<sub>2</sub> flake. Inset shows the stoichiometry of the MoS<sub>2</sub> flake.

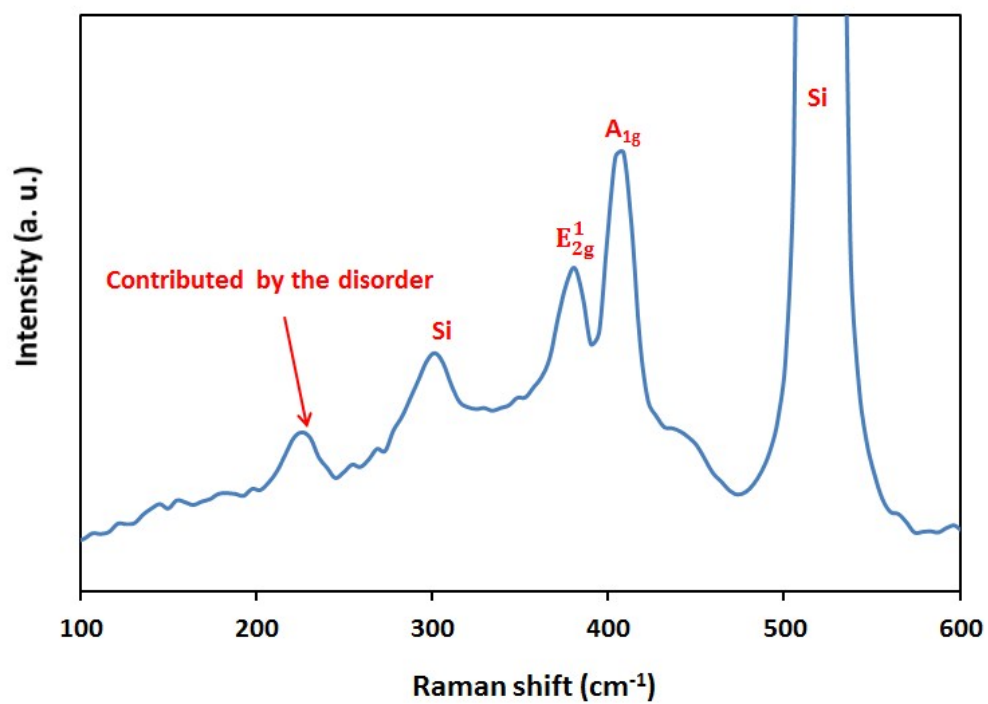

**Figure S4.** Raman spectrum of DETA silanised MoS<sub>2</sub> on Si/SiO<sub>2</sub> substrate.

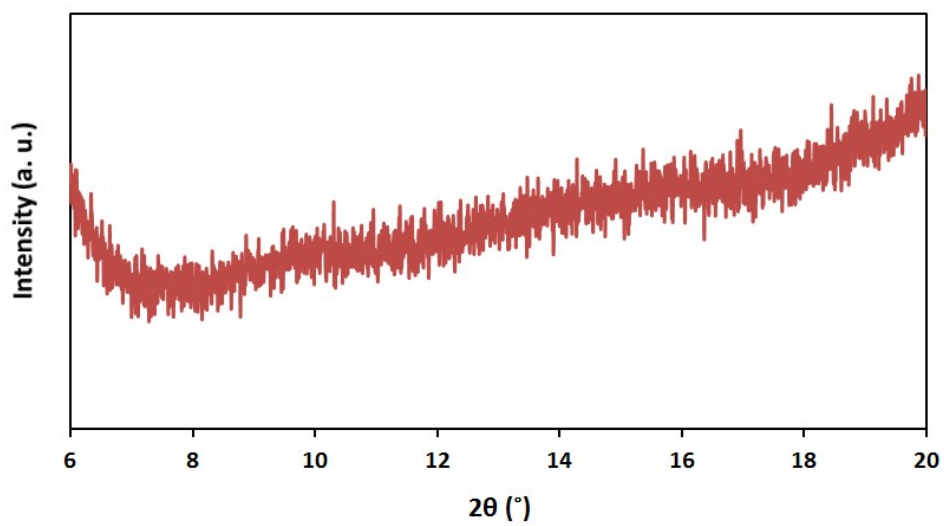

**Figure S5.** XRD pattern of quasi 2D MoS<sub>2</sub> sheets.
